# Supplementary material
Source: PubMed Central journal article supplement (PMC4505280)
Supplement: AAC.04652-14_zac006154072so1.pdf [file AAC.04652-14_zac006154072so1.pdf]

**Supplemental Table 1 - Statistical Comparisons of Selected Plasma N-Acetyl-CEM-101 Pharmacokinetic Parameters on Days 1 and 5**

| Comparison                                                                                            | Parameter                       | Geometric LS Means |                 | Geometric Mean Ratio (%) (test/reference) | 90% Confidence Intervals | %CV    |
|-------------------------------------------------------------------------------------------------------|---------------------------------|--------------------|-----------------|-------------------------------------------|--------------------------|--------|
|                                                                                                       |                                 | Test Group         | Reference Group |                                           |                          |        |
| <b>Day 1</b>                                                                                          |                                 |                    |                 |                                           |                          |        |
| Mild versus Control                                                                                   | C <sub>max</sub> (µg/mL)        | 0.067              | 0.050           | 133.06                                    | 57.44 - 308.24           | 128.55 |
|                                                                                                       | AUC <sub>0-inf</sub> (µg•hr/mL) | 0.616              | 0.835           | 73.85                                     | 36.83 - 148.09           | 92.79  |
| Moderate versus Control                                                                               | C <sub>max</sub> (µg/mL)        | 0.069              | 0.050           | 137.99                                    | 59.57 - 319.67           | 128.55 |
|                                                                                                       | AUC <sub>0-inf</sub> (µg•hr/mL) | 0.787              | 0.835           | 94.25                                     | 47.00 - 188.98           | 92.79  |
| Severe versus Control                                                                                 | C <sub>max</sub> (µg/mL)        | 0.136              | 0.050           | 268.74                                    | 116.01 - 622.55          | 128.55 |
|                                                                                                       | AUC <sub>0-inf</sub> (µg•hr/mL) | 1.654              | 0.835           | 198.01                                    | 96.53 - 406.21           | 92.79  |
| <b>Day 5</b>                                                                                          |                                 |                    |                 |                                           |                          |        |
| Mild versus Control                                                                                   | C <sub>max</sub> (µg/mL)        | 0.062              | 0.047           | 132.78                                    | 68.27 - 258.25           | 91.85  |
|                                                                                                       | AUC <sub>0-tau</sub> (µg•hr/mL) | 0.545              | 0.423           | 128.99                                    | 67.92 - 244.96           | 87.51  |
| Moderate versus Control                                                                               | C <sub>max</sub> (µg/mL)        | 0.073              | 0.047           | 154.99                                    | 79.69 - 301.46           | 91.85  |
|                                                                                                       | AUC <sub>0-tau</sub> (µg•hr/mL) | 0.697              | 0.423           | 164.76                                    | 86.76 - 312.89           | 87.51  |
| Severe versus Control                                                                                 | C <sub>max</sub> (µg/mL)        | 0.104              | 0.047           | 220.60                                    | 113.42 - 429.07          | 91.85  |
|                                                                                                       | AUC <sub>0-tau</sub> (µg•hr/mL) | 1.225              | 0.423           | 289.55                                    | 152.47 - 549.88          | 87.51  |
| Parameters were ln-transformed prior to analysis.                                                     |                                 |                    |                 |                                           |                          |        |
| Geometric least-squares means (LS Means) are calculated by exponentiating the LSMEANS from the ANOVA. |                                 |                    |                 |                                           |                          |        |
| % Geometric Mean Ratio = 100*(test/reference)                                                         |                                 |                    |                 |                                           |                          |        |

**Supplemental Table 2 - Statistical Comparisons of Selected Plasma CEM-214 Pharmacokinetic Parameters on Days 1 and 5**

| Comparison                                                                                                                                                                                                  | Parameter                       | Geometric LS Means |                 | Geometric Mean Ratio (%)<br>(test/reference) | 90% Confidence Intervals | %CV   |
|-------------------------------------------------------------------------------------------------------------------------------------------------------------------------------------------------------------|---------------------------------|--------------------|-----------------|----------------------------------------------|--------------------------|-------|
|                                                                                                                                                                                                             |                                 | Test Group         | Reference Group |                                              |                          |       |
| <b>Day 1</b>                                                                                                                                                                                                |                                 |                    |                 |                                              |                          |       |
| Mild versus Control                                                                                                                                                                                         | C <sub>max</sub> (µg/mL)        | 0.030              | 0.025           | 121.62                                       | 62.16 - 237.93           | 92.93 |
|                                                                                                                                                                                                             | AUC <sub>0-inf</sub> (µg·hr/mL) | 0.426              | 0.628           | 67.96                                        | 36.29 - 127.27           | 76.53 |
| Moderate versus Control                                                                                                                                                                                     | C <sub>max</sub> (µg/mL)        | 0.015              | 0.025           | 59.71                                        | 30.52 - 116.81           | 92.93 |
|                                                                                                                                                                                                             | AUC <sub>0-inf</sub> (µg·hr/mL) | 0.342              | 0.628           | 54.47                                        | 28.54 - 103.95           | 76.53 |
| Severe versus Control                                                                                                                                                                                       | C <sub>max</sub> (µg/mL)        | 0.013              | 0.025           | 53.49                                        | 27.34 - 104.65           | 92.93 |
|                                                                                                                                                                                                             | AUC <sub>0-inf</sub> (µg·hr/mL) | 0.238              | 0.628           | 37.87                                        | 19.84 - 72.27            | 76.53 |
| <b>Day 5</b>                                                                                                                                                                                                |                                 |                    |                 |                                              |                          |       |
| Mild versus Control                                                                                                                                                                                         | C <sub>max</sub> (µg/mL)        | 0.029              | 0.026           | 108.93                                       | 67.57 - 175.59           | 60.86 |
|                                                                                                                                                                                                             | AUC <sub>0-tau</sub> (µg·hr/mL) | 0.375              | 0.514           | 72.99                                        | 48.68 - 109.46           | 48.50 |
| Moderate versus Control                                                                                                                                                                                     | C <sub>max</sub> (µg/mL)        | 0.020              | 0.026           | 75.75                                        | 46.99 - 122.11           | 60.86 |
|                                                                                                                                                                                                             | AUC <sub>0-tau</sub> (µg·hr/mL) | 0.277              | 0.514           | 53.90                                        | 35.94 - 80.83            | 48.50 |
| Severe versus Control                                                                                                                                                                                       | C <sub>max</sub> (µg/mL)        | 0.013              | 0.026           | 48.47                                        | 30.07 - 78.13            | 60.86 |
|                                                                                                                                                                                                             | AUC <sub>0-tau</sub> (µg·hr/mL) | 0.198              | 0.514           | 38.51                                        | 25.68 - 57.75            | 48.50 |
| Parameters were ln-transformed prior to analysis.<br>Geometric least-squares means (LS Means) are calculated by exponentiating the LSMEANS from the ANOVA.<br>% Geometric Mean Ratio = 100*(test/reference) |                                 |                    |                 |                                              |                          |       |
